# Supplementary material
Source: PubMed Central journal article supplement (PMC3516603)
Supplement: mmc1.pdf [file mmc1.pdf]

## Supplemental Data

### Identification of Mutations in *TMEM5* and *ISPD*

#### as a Cause of Severe Cobblestone Lissencephaly

Sandrine Vuillaumier-Barrot, Céline Bouchet-Séraphin, Malika Chelbi, Louise Devisme, Samuel Quentin, Steven Gazal, Annie Laquerrière, Catherine Fallet-Bianco, Philippe Loget Sylvie Odent, Dominique Carles, Anne Bazin, Jacqueline Aziza, Alix Clemenson, Fabien Guimiot, Maryse Bonnière, Sophie Monnot, Christine Bole-Feysot, Jean-Pierre Bernard, Laurence Loeuillet, Marie Gonzales, Koryna Socha, Bernard Grandchamp, Tania Attié-Bitach, Férehté Encha-Razavi, and Nathalie Seta

**Figure S1:** Pedigrees of our two multiplex families: **A:** Family 1 and **B:** Family 2, in which the first *ISPD* and *TMEM5* mutations were detected. Black diamonds indicate fetuses with cobblestone-LIS.

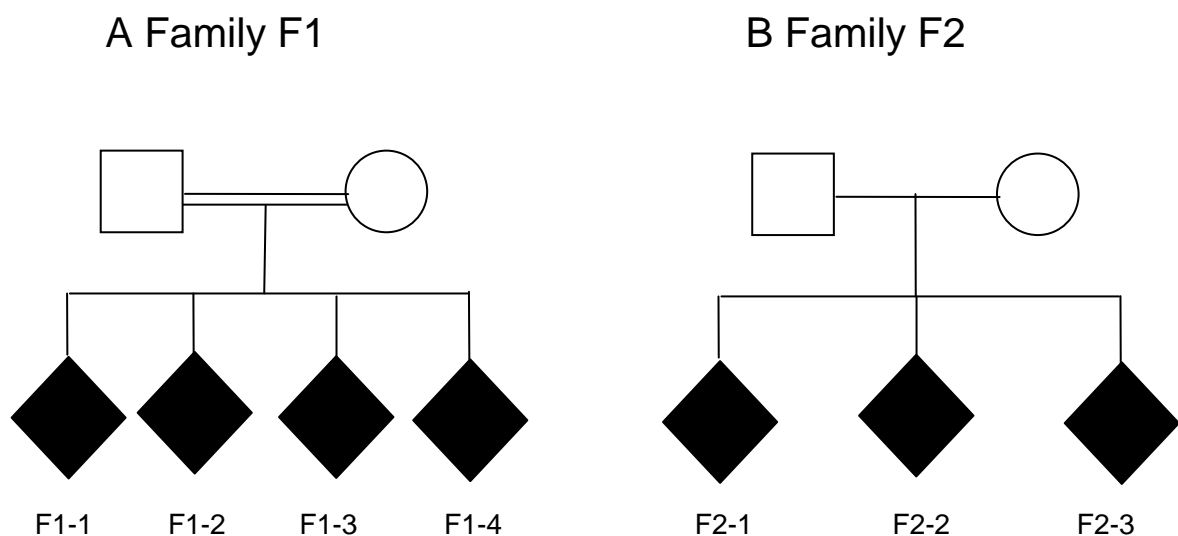

**Figure S2:** Alignment of the amino acid sequences of TMEM5 with EXT1 (BlastP) showing 19 % of identities between TMEM5 amino acid 218 to 353. Amino acids concerned by substitutions are in bold. DXD motifs (putative glycosyltransferase catalytic site motifs) are underlined for each gene.

```

                                Glu265fs*8, Arg266Glyfs*8
TMEM5  218  NGGFVELLFIIYDSPWINDVDVFQWPLGVA-----TYRNF-PVVEASWSMLHDERP-- 267
      N G  L+F +Y  W + + + +G A      + NF P + S + + P
EXT1   185  NNGRNHLIFNLYSGTWPDYTEDVGFDIGQAMLAKASISTENFRPNFDVSIPLFSKDHPRT 244

TMEM5  268  -----YLCNFLGTY----ENSSRQALMNILKKDGNKLCWSAR--E 304
      Y+  F G Y      + +R AL ++  +G D +  + + +
EXT1   245  GGERGFLKFNTIPPLRKYMLVFKGKRYLTGIGSDTRNALYHV--HNGEDVLLTTCKHGK 302
                                Arg280Gly or Arg280Ser

                                Tyr369Cys, Arg340Leu
TMEM5  305  HWQPQETNESLK-----NYQDALLQSDLTLCPVGVNTECYRIYEACSYGSIPVV 353
      WQ  + + +      +Y++ L +  L P G      +R EA      +PV+
EXT1   303  DWQKHKDSRCDRDNTEYEKYDYREMLHNATFCLVPRGRRLGSFRFLEALQAACVPVM 359
                                Arg339Asp
                                Arg340Ser, Arg340Cys, Arg340Leu or Arg340his

```

**Table S1:** ROH of the consanguineous family F1, and linkage regions of more than 2 Mb with an LOD score >1 for the multiplex family F2. A homozygote mutation was found in the *TMEM5* gene on chr12:64 173 637-64 202 887, and hemizygoty was found in the *ISPD* gene on chr7:16,127,152-16,460,947 (hg19).

| ROH in consanguineous Family 1 |                 |                 |             |                 |
|--------------------------------|-----------------|-----------------|-------------|-----------------|
| Chromosome                     | Start (hg19)    | End (hg19)      | size Mb     | Number of genes |
| 4                              | 157174388       | 163243244       | 6.06        | 20              |
| 4                              | 171298350       | 182716439       | 11.42       | 37              |
| <b>12</b>                      | <b>63212175</b> | <b>64379443</b> | <b>1.17</b> | <b>10</b>       |
| 15                             | 85493132        | 87388101        | 1.89        | 15              |
| 20                             | 41107656        | 41182902        | 1.07        | 5               |

| Linkage regions of more than 2 Mb with LOD score >1 for multiplex family F2 |               |                 |              |                 |
|-----------------------------------------------------------------------------|---------------|-----------------|--------------|-----------------|
| Chromosome                                                                  | Start (hg19)  | End (hg19)      | size Mb      | Number of genes |
| 1                                                                           | 60748394      | 68618199        | 7.86         | 64              |
| 6                                                                           | 11470562      | 13089826        | 16.19        | 111             |
| <b>7</b>                                                                    | <b>792020</b> | <b>25345110</b> | <b>24.55</b> | <b>239</b>      |
| 7                                                                           | 25364592      | 36700216        | 11.30        | 132             |
| 10                                                                          | 15926632      | 36961506        | 21.03        | 176             |
| 11                                                                          | 7835752       | 15144280        | 7.30         | 88              |
| 17                                                                          | 15082587      | 23019858        | 7.93         | 198             |
| 20                                                                          | 15734480      | 26170699        | 10.43        | 132             |
| 20                                                                          | 29314247      | 46819863        | 17.50        | 328             |
| 21                                                                          | 15821015      | 41172018        | 25.35        | 270             |

**Table S2:** Exome sequencing. DNA (5 µg) of two fetuses in each family was subjected to exome sequencing using the Sure Selecthuman All exon 50MB kit from Agilent ; captured exons were subsequently sequenced using the GAIIX Illumina (2x72 bp reads) technologies. The sequences were aligned to the human genome reference sequence (hg19 assembly). All calls with read coverage  $\leq 2$  and a Phred-scaled SNP quality of  $\leq 20$  were filtered out. Filtering of the data by removing the known variants, non coding and synonymous coding sequence variations, combined with mapping data identified a unique gene within targeted homozygous regions in F1 or linkage regions in F2. The mutated gene was found in indel data for F1 and SNV data for F2.

| Indel                                                                     | Number of variations F1-1 | Number of variations F1-2 |
|---------------------------------------------------------------------------|---------------------------|---------------------------|
| Total variants                                                            | 27 506                    | 28 444                    |
| Coding disrupted frameshift                                               | 831                       | 1 019                     |
| Unknown variants (dbSNP132/1K genome/EVS and in-house database filtering) | 538                       | 720                       |
| Quality filtering (Coverage $\geq 5$ reads)                               | 455                       | 557                       |
| Homozygosity (% reads variation/ref $>0.7$ )                              | 75                        | 57                        |
| Mapping analysis                                                          | 1                         | 1                         |

| SNV                                                                       | Number of variations F2-1 | Number of variations F2-2 | Number of common variations (F2-1 & F2-2) |
|---------------------------------------------------------------------------|---------------------------|---------------------------|-------------------------------------------|
| Total variants                                                            | 203 604                   | 206 683                   |                                           |
| Non-synonymous + Essential Splice-sites variants                          | 27 548                    | 28 005                    |                                           |
| Unknown variants (dbSNP132/1K genome/EVS and in-house database filtering) | 1 028                     | 950                       |                                           |
| Quality filtering (Coverage $\geq 5$ reads)                               | 970                       | 915                       |                                           |
| Mapping analysis                                                          | 46                        | 52                        | 35                                        |
| Mutated Genes                                                             | 18                        | 16                        | 12                                        |
| Gene(s) with two mutated alleles                                          | 1                         | 1                         | 1                                         |

**Table S3:** Primers for for *TMEM5* and *ISPD* amplification and direct sequencing.

Mutational screening of *TMEM5* and *ISPD* was performed by direct sequencing of PCR products of the 6 and 10 coding exons and the adjacent intronic junctions respectively. Size of amplification products are indicated. Supplemented primers were used for sequence only. PCR primers were selected with ExonPrimer according to reference sequence NM\_014254.1 and NM\_001101426.3 PCR products were purified with the Exo-SAP cleanup kit (USB) and sequenced with BigDye chemistry and ABI PRISM 3130XL sequencer (Applied Biosystems). Sequences were analyzed with SeqScape® software.

| GENE     | Oligo name                         | Sequence                           | Size (bp) |
|----------|------------------------------------|------------------------------------|-----------|
| TMEM5    | 1S_TMEM5                           | CTG-GGG-ACT-GCC-TGG-AAA-C          | 395       |
|          | 1R_TMEM5                           | TCA-GGC-CCT-GCG-GGT-AAT-C          |           |
|          | 2S_TMEM5                           | TTT-TGT-TTT-CAT-TGT-GTA-TTA-CCA-G  | 472       |
|          | 2R2_TMEM5                          | TGT-CTA-ATT-GGA-AGG-AGA-AAG-G      |           |
|          | 3S_TMEM5                           | TGA-TTT-GGA-GCT-GTT-GCT-TG         | 490       |
|          | 3R_TMEM5                           | TGA-TGC-CAA-AAA-GGA-GTA-TTC        |           |
|          | 4S_TMEM5                           | TGT-GGA-TTA-AAT-CTC-ATT-GTA-G      | 501       |
|          | 4R_TMEM5                           | AAT-TTT-GAA-TAA-GTC-TTC-CTG-G      |           |
|          | 5S_TMEM5                           | GGA-GTT-TTC-CAA-AGT-ATT-CAT-GG     | 453       |
|          | 5R_TMEM5                           | ATC-TTC-TGG-GGA-AAG-ATT-GG         |           |
|          | 6S_TMEM5                           | ATC-ATC-TCT-ATA-AAG-TTT-CAC-C      | 636       |
|          | 6R_TMEM5                           | CCT-TAA-AGA-ACA-TCT-ATA-AAT-AC     |           |
|          | 6R2_TMEM5                          | GTG-GTG-CAC-AGA-TGT-ATT-CC         |           |
|          | 6S2_TMEM5                          | TGA-GGC-TTG-CTC-CTA-TGG-C          |           |
| ISPD     | ISPD_1S                            | GTC-CCT-CTC-CGT-GGT-CTG            | 487       |
|          | ISPD_1R                            | TGA-ATA-ACT-GAG-CGC-GGC            |           |
|          | ISPD_2S                            | TTA-ACT-TGC-AGT-TTT-TAA-TCT-CC     | 498       |
|          | ISPD_2R                            | TGA-CAT-TTA-AAC-AGA-ATT-GAA-TC     |           |
|          | ISPD_3S                            | TTT CTT AAG GTA GCT TGT TGA AGG    | 368       |
|          | ISPD_3R                            | ACG CTC AGT CCC ATC AGT TC         |           |
|          | ISPD_3S2                           | ATC-TGT-CAA-AAG-TGA-GAT-ACT-G      | 312       |
|          | ISPD_4S                            | CCC-TTC-CTT-TGT-TTG-CAA-TG         |           |
|          | ISPD_4R                            | CCG-TGA-GAC-TCC-CTT-AAC-TCC        |           |
|          | ISPD_5S                            | ATT-TTA-TGT-GAA-TTT-GCT-GAT-GC     | 332       |
|          | ISPD_5R                            | AAT-CAG-AGA-CCT-TGG-CCT-AC         |           |
|          | ISPD_6S                            | TGG-CCT-GAA-ATC-AAA-ACC-TC         | 375       |
|          | ISPD_6R                            | CTG-GCA-GAC-CAA-AGG-ATC-TC         |           |
|          | ISPD_6S2                           | ATT-TCA-GAG-AGA-ATT-TCC-CAA-G      | 395       |
|          | ISPD_7S                            | ATG-GTC-CTT-GGC-TTT-ATG-GG         |           |
|          | ISPD_7R                            | TTG-TCC-AAA-ATA-CCA-CTC-TTC-TC     | 400       |
|          | ISPD_8S                            | GGC-AGG-TTT-GAC-TCA-ATT-AGT-AG     |           |
|          | ISPD_8R                            | TTG-AGT-ATG-GGT-CAA-TGC-TCT-C      | 360       |
|          | ISPD_9S                            | AAT-CAT-ATG-GGT-TTT-GAG-CTT-C      |           |
|          | ISPD_9R                            | GCA-CAC-ACA-TAG-ATG-AGT-AAC-TTT-CC | 482       |
| ISPD_10S | TCC-TCT-TTA-TTC-GGG-GAA-CC         |                                    |           |
| ISPD_10R | GTT-CAG-GCA-ATT-AAT-ATT-TGT-CAT-AC |                                    |           |
